# Supplementary material for: Selective growth of graphene in layer-by-layer via chemical vapor deposition
Source: Royal Society of Chemistry journal article supplement (doi:10.1039/c6nr04306b), 2016-01-01
Supplement: c6nr04306b1.pdf [file c6nr04306b1.pdf]

## Supporting Information

### **Title: Selective Growth of Graphene in Layer-by-Layer via Chemical Vapor Deposition**

#### **Authors:**

*Jaehyun Park*<sup>1,2</sup>†, *Hyosub An*<sup>1,2</sup>††, *Dongchul Choi*<sup>1,2</sup>, *Sajjad Hussain*<sup>1,2</sup>, *Wooseok Song*<sup>3</sup>, *Ki-Seok An*<sup>3</sup>, *Won-Jun Lee*<sup>2</sup>, *Naesung Lee*<sup>2</sup>, *Wan-Gyu Lee*<sup>4,\*</sup>, *Jongwan Jung*<sup>1,2\*</sup>

#### **Affiliations:**

<sup>1</sup>Graphene Research Institute, Sejong University, Seoul 143-747, Korea

<sup>2</sup>Faculty of Nanotechnology and Advanced Materials Engineering Sejong University, Seoul 143-747, Korea

<sup>3</sup>Thin Film Materials Research Center, Korea Research Institute of Chemical Technology, Daejeon 305-600, Korea

<sup>4</sup>Department of Nanodevice, National NanoFab Center, Daejeon 305-600, Korea

†Current address: Samsung Electronics, Kyunggi-do, Korea

††Current address: SIMMTECH, Cheongju-si, Korea

Jaehyun Park and Hyosub An contributed equally to this paper.

\*Corresponding authors: Email: [jwjung@sejong.ac.kr](mailto:jwjung@sejong.ac.kr) (J.W.J); [wangyulee@nnfc.re.kr](mailto:wangyulee@nnfc.re.kr) (W-G.L)

Keywords: Graphene, CVD, layer-by-layer growth, selective growth

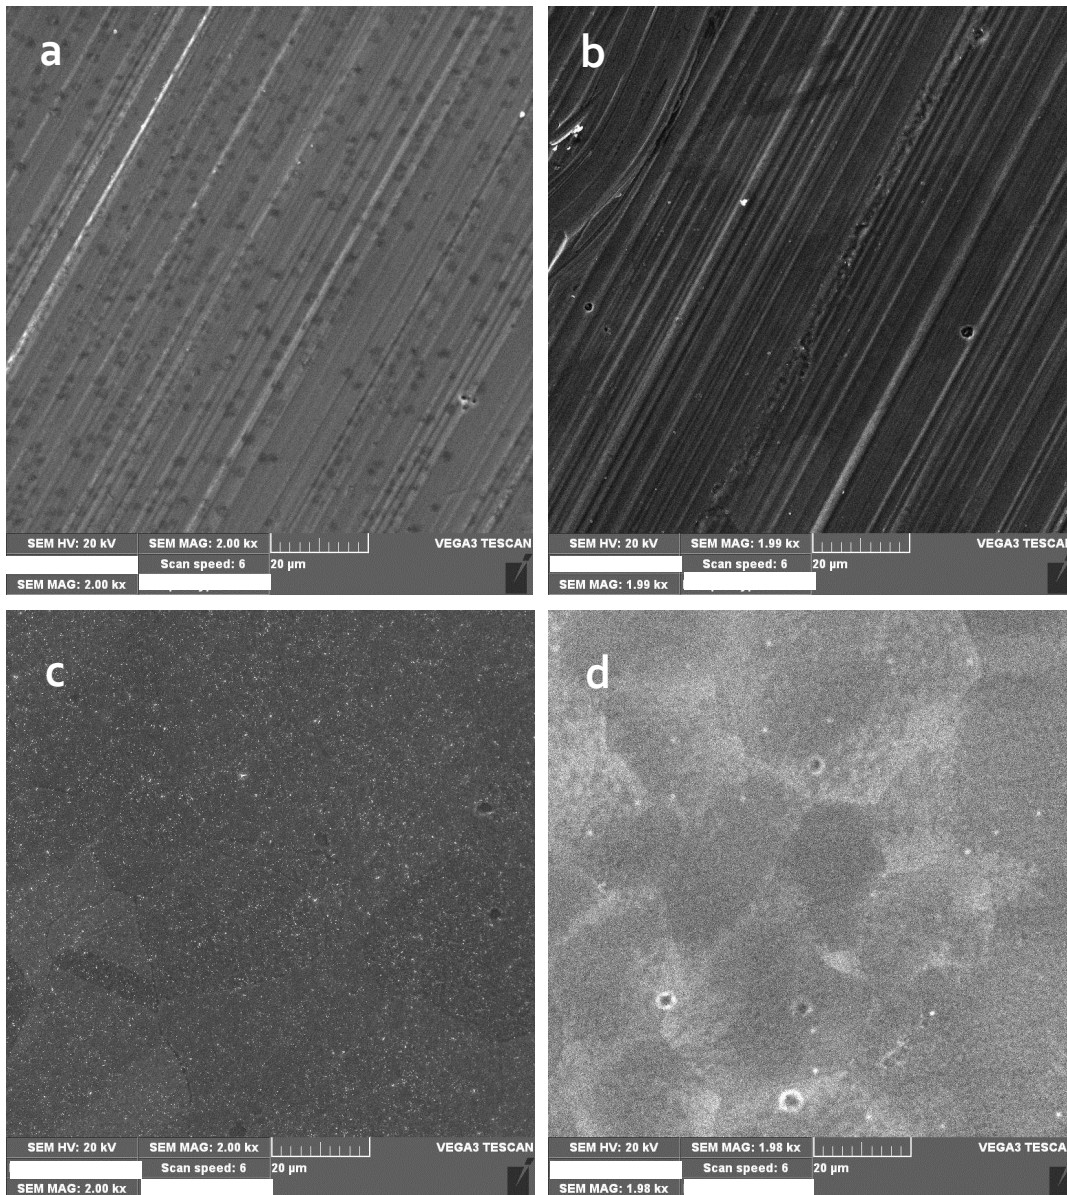

Figure S1. SEM images of the as-grown graphene films using unpolished Cu foil and polished one. (a) After first CVD using an unpolished Cu foil. (b) After second CVD using an unpolished Cu foil. (c) After first CVD using a polished Cu foil. (d) After second CVD using a polished Cu foil. The first CVD was performed for 10 min. A thin Cu (~40 nm) was deposited, and the second CVD was performed for 30 min.

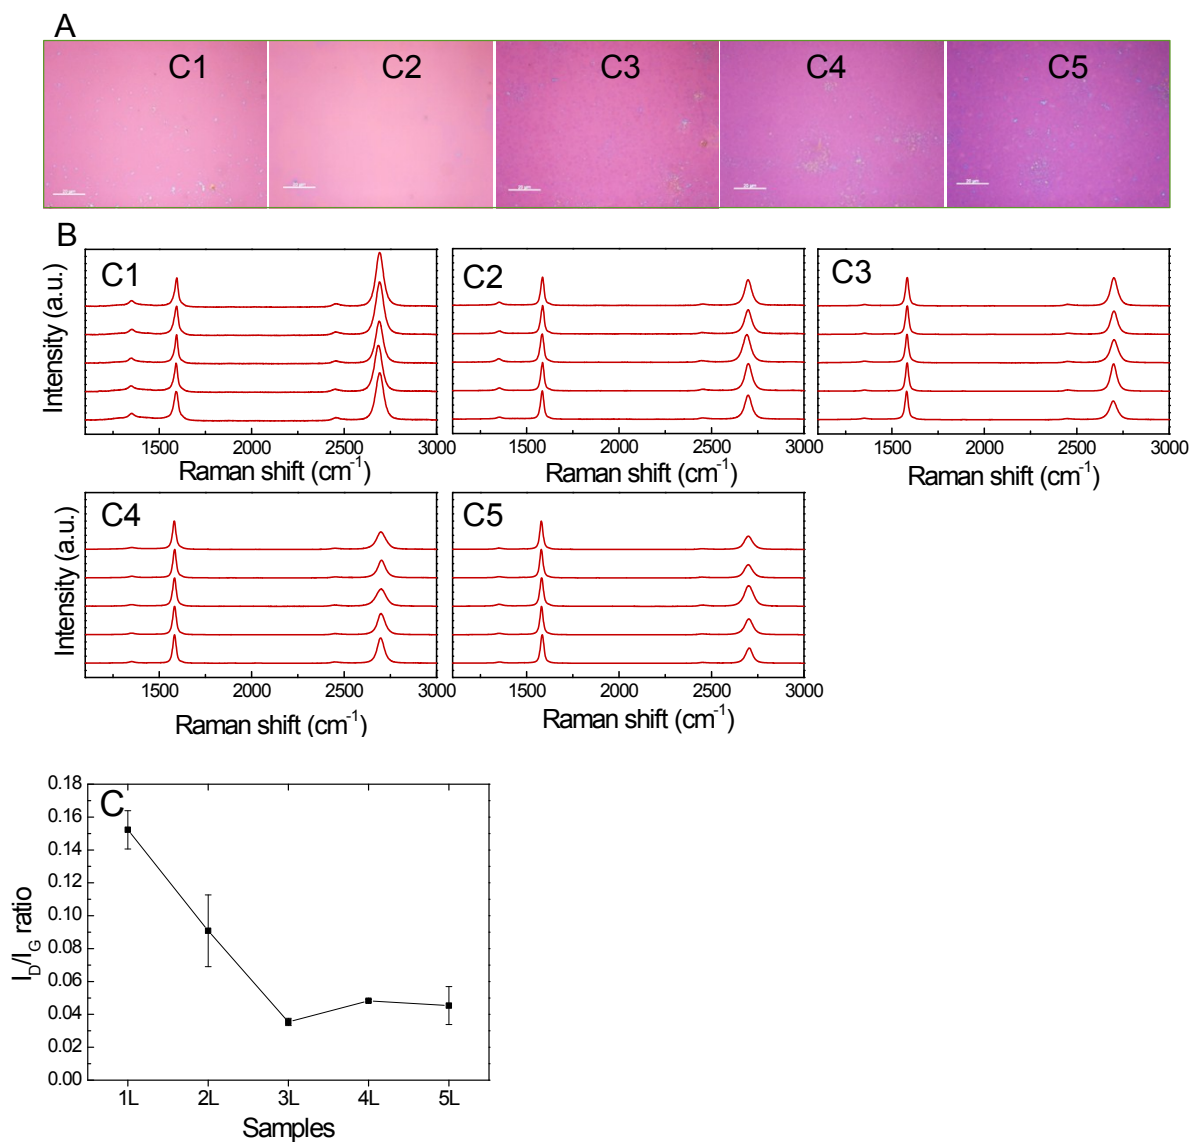

Figure S2. (A) Optical image of transferred graphene films (C1,C2,C3,C4,C5) onto a SiO<sub>2</sub>/Si substrate (scale bar, 20 μm). (B) Raman spectra (Renishaw Co., wavelength 514 nm) taken from five random points of each graphene sample (C1-C5). (C) Extracted I<sub>D</sub>/I<sub>G</sub> ratios (average and standard deviation values) of transferred graphene films (C1,C2,C3,C4,C5).

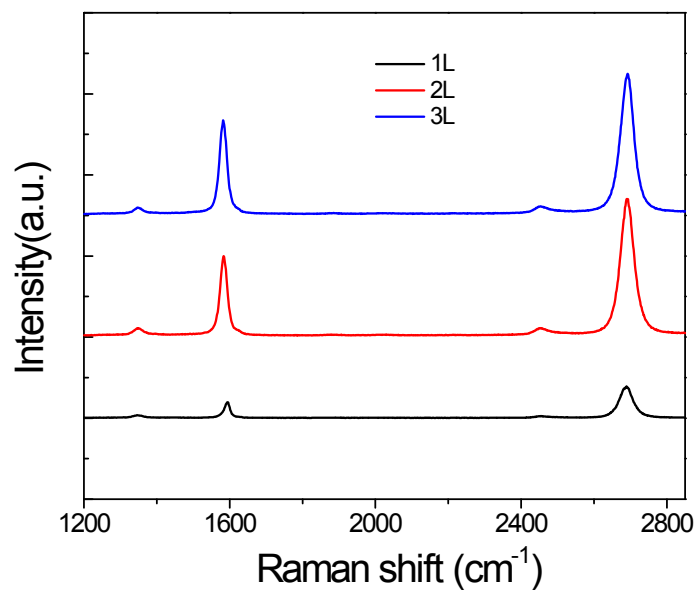

Figure S3. Raman spectra (wavelength 514 nm) of 1L graphene and non-Bernal-stacked 2L, 3L graphene. The 2L and 3L graphene films were made by layer-by-layer transfer onto a SiO<sub>2</sub>/Si substrate using the PMMA method.

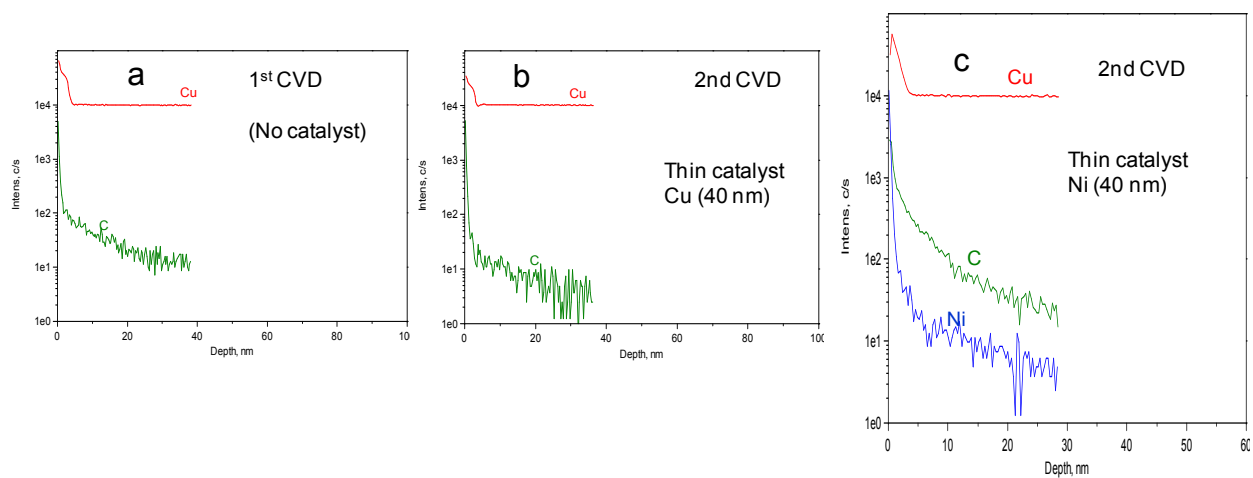

Figure S4. SIMS depth profile of Cu and carbon in Cu foil (a) after first CVD, (b) after second CVD (a thin 40 nm Cu catalyst was applied), and (c) SIMS depth profile of Cu and carbon and Ni after second CVD (a thin 40 nm Ni catalyst was applied).

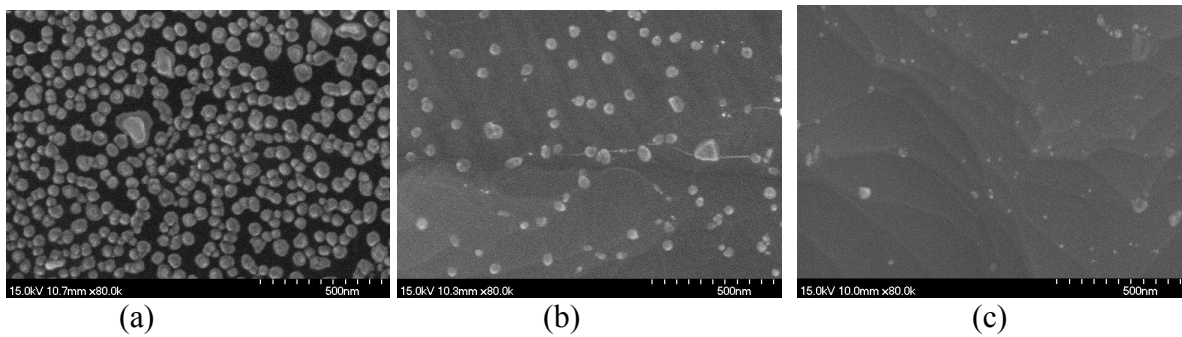

Figure S5. SEM images of thin Cu layer after second CVD. (a) after 30s, (b) 1 m, (c) 1m 30s.

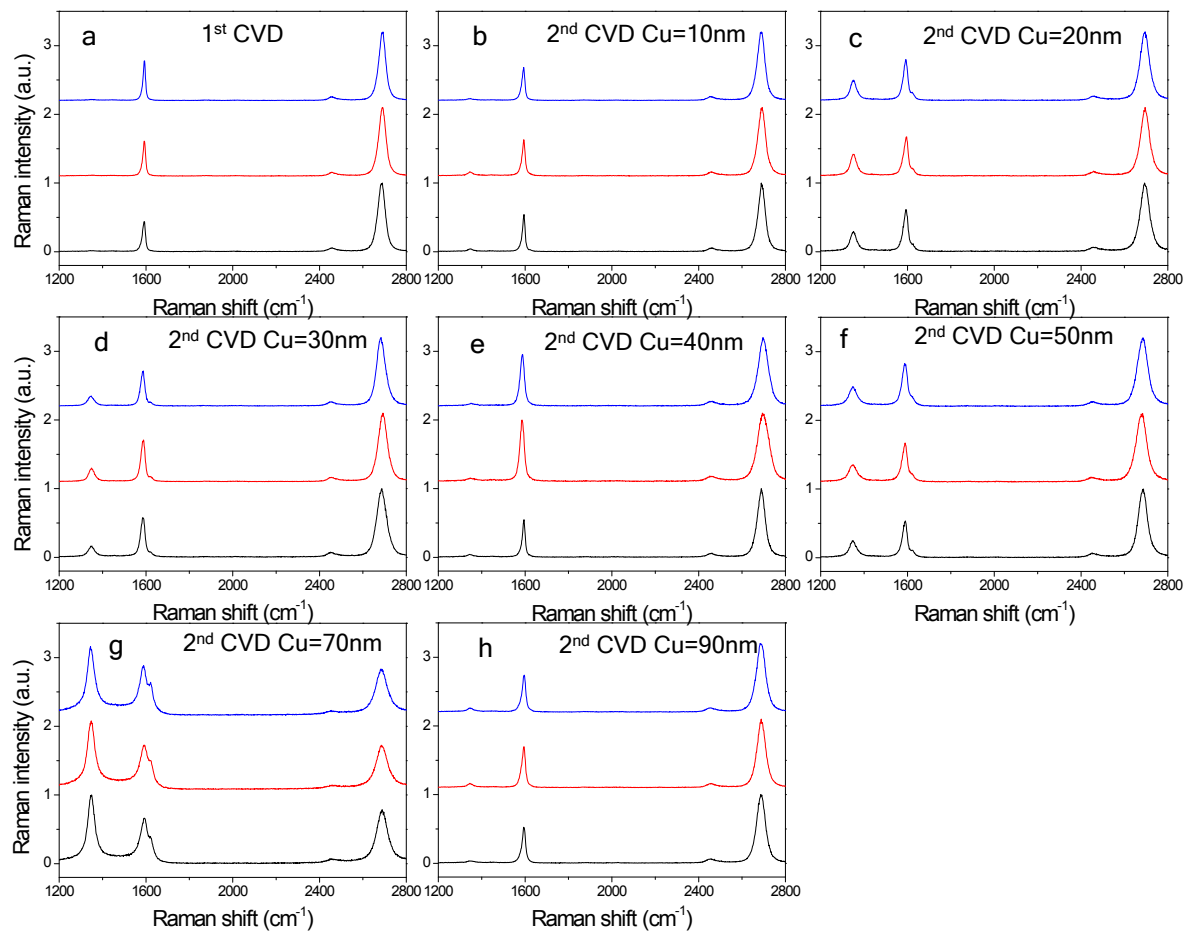

Figure S6. Raman spectra of graphene films grown using different top Cu film thickness. The methane and hydrogen flow was set to 10 and 200 sccm, respectively.

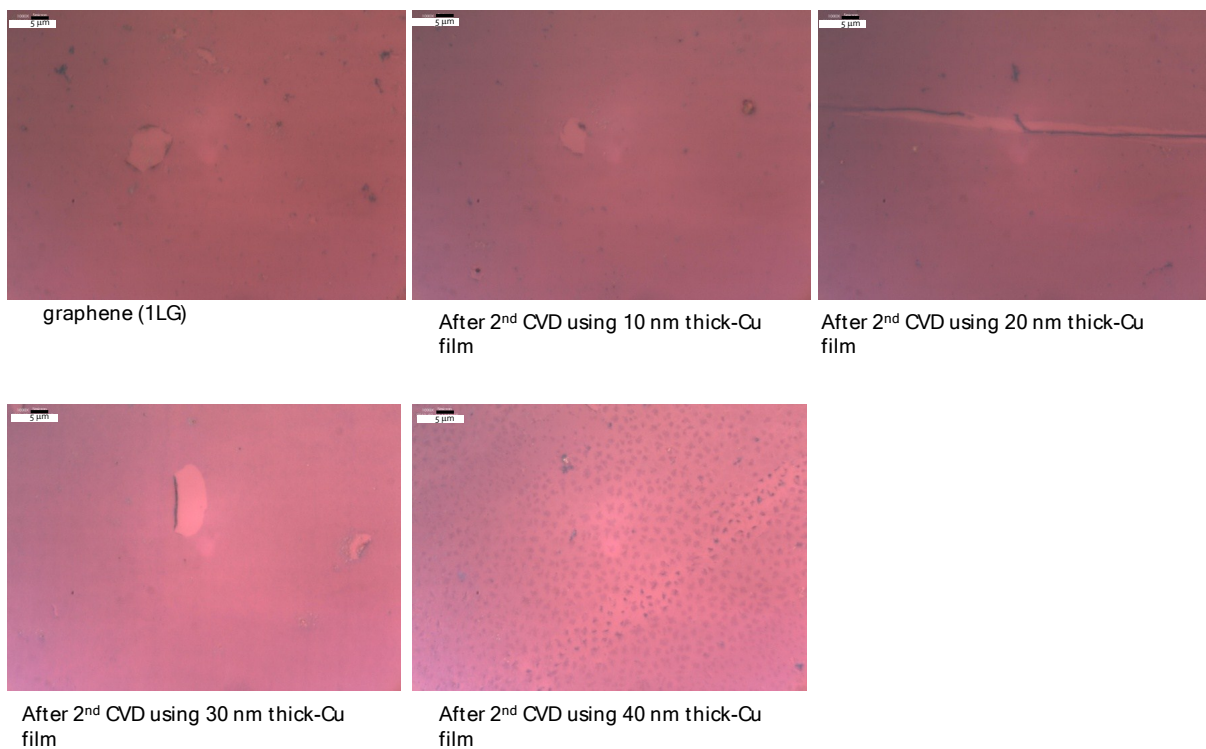

Figure S7. Optical images of the transferred graphene films grown using different Cu film thickness. For 40 nm-Cu case, 2L with isolated grains are spotted. The methane and hydrogen flow for the second CVD was set to 10 and 200 sccm, respectively.



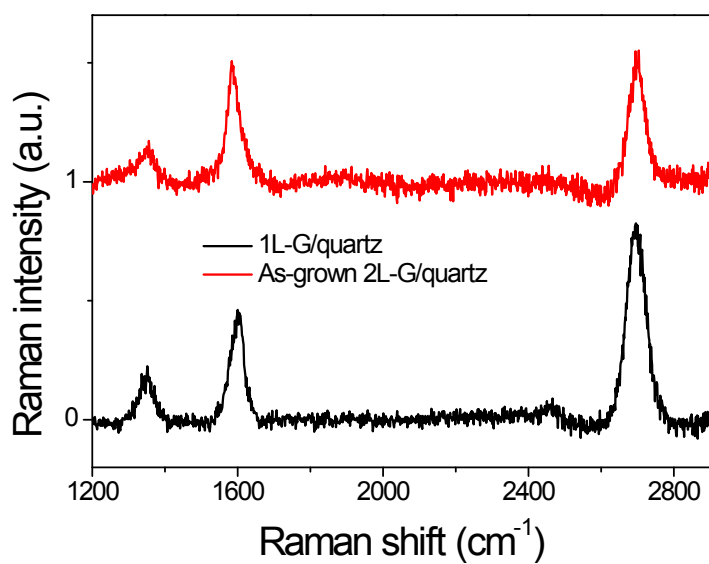

Figure S8. Raman spectra of graphene films on a quartz wafer. The 1L graphene was transferred on a quartz wafer (black line). And second CVD was performed (red one) after  $\sim 40$  nm Cu film was deposited. The  $I_{2D}/I_G$  ratio decreased to  $\sim 1$  after the second CVD, supporting that the layer thickness was increased.
